# Supplementary material for: Prognostic and diagnostic significance of galectins in pancreatic cancer: a systematic review and meta-analysis
Source: Springer Nature journal article supplement (doi:10.1186/s12935-019-1025-5), 2019-11-21
Supplement: MOESM2 [file 17415828]

**a**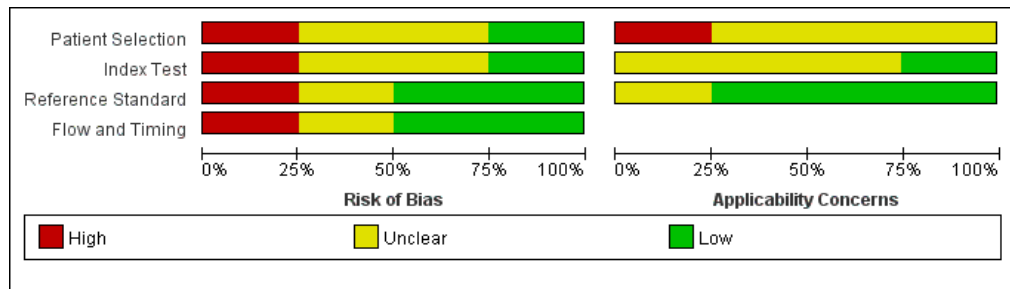**b**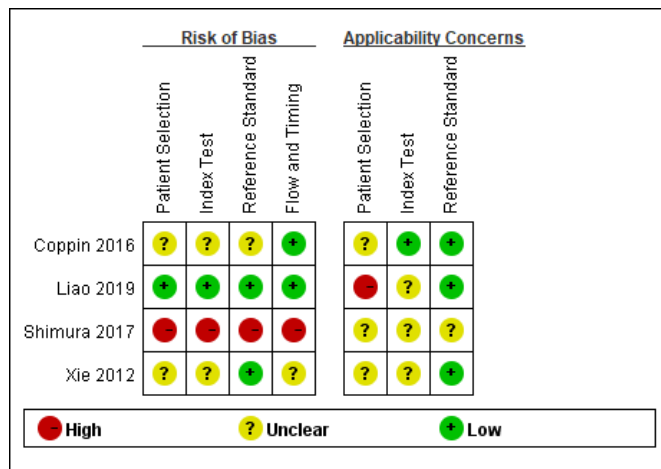

**Fig. S1 a** Risk of bias and applicability concerns; **b** Risk of bias and applicability concerns.

**a**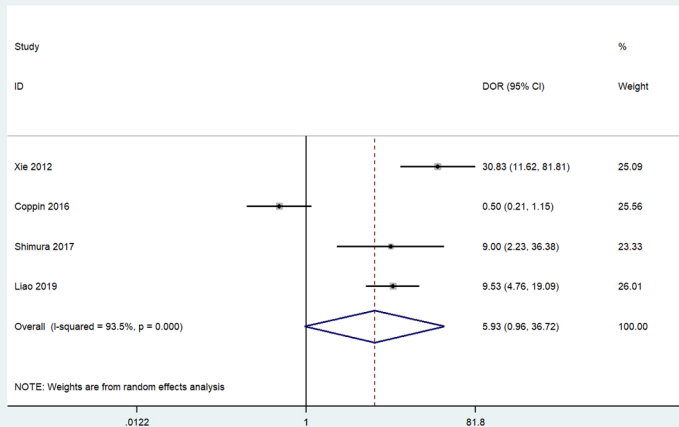**b**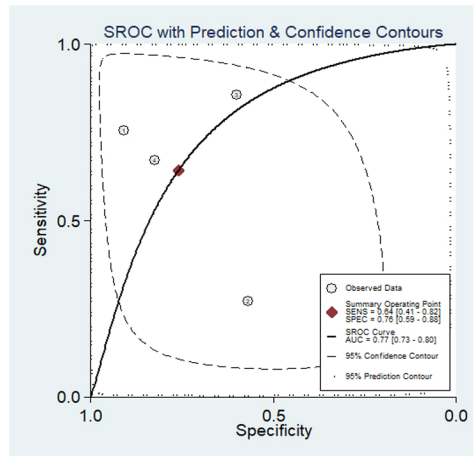

**Fig. S2 a** Diagnostic odds ratio of galectin-3 for diagnosis of pancreatic cancer; **b** Summary receiver operating characteristic (SROC) curve for the diagnostic accuracy of galectin-3 in diagnosing for pancreatic cancer.

**a**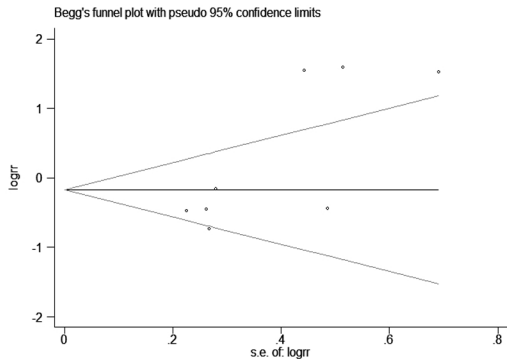**b**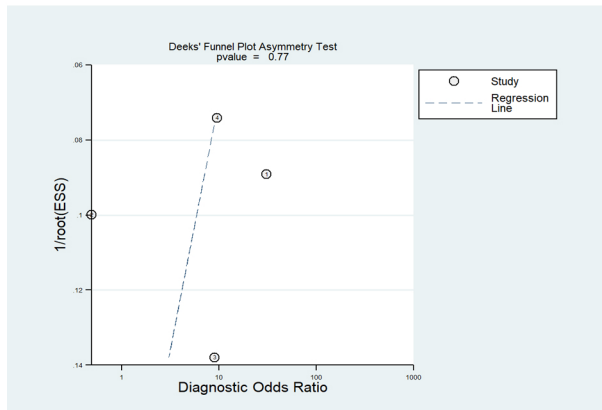

**Fig. S3** Funnel plot for publication bias. **a** Begg's funnel plot; **b** Deeks' funnel plot.
